# Supplementary material for: Vocal fold control beyond the species-specific repertoire in an orang-utan
Source: PubMed Central journal article supplement (PMC4962094; doi:10.1038/srep30315), 2016-07-27
Supplement: srep30315-s1.pdf [file srep30315-s1.pdf]

Supplementary material

**Vocal fold control beyond the species-specific repertoire in an orangutan**

Adriano R. Lameira, Madeleine E. Hardus, Alexander Mielke, Serge A. Wich, Robert W. Shumaker

Supplementary table. 1. Descriptive statistics of orang-utan wookies and grumphs

|                      | Call   | N   | Median | 1 <sup>st</sup> qrt | 3 <sup>rd</sup> qrt | min   | max   |
|----------------------|--------|-----|--------|---------------------|---------------------|-------|-------|
| Duration (s)         | Wookie | 124 | 0.381  | 0.252               | 0.515               | 0.134 | 1.24  |
|                      | Grumph | 39  | 0.164  | 0.144               | 0.2                 | 0.059 | 0.287 |
| Median pitch (Hz)    | Wookie | 124 | 117.4  | 103.8               | 131.8               | 68.6  | 180.3 |
|                      | Grumph | 39  | 219.9  | 120.1               | 248.3               | 75.7  | 292.2 |
| Mean pitch (Hz)      | Wookie | 124 | 112.4  | 102.6               | 130.1               | 76.8  | 182.5 |
|                      | Grumph | 39  | 210.4  | 149.4               | 246.6               | 76.7  | 294.9 |
| S.D. pitch (Hz)      | Wookie | 124 | 15.8   | 9.6                 | 24.9                | 3.2   | 46.4  |
|                      | Grumph | 39  | 34.7   | 13.8                | 64.5                | 1.4   | 111.7 |
| Min pitch (Hz)       | Wookie | 124 | 76.1   | 65.2                | 104.3               | 57.1  | 160.6 |
|                      | Grumph | 39  | 114.6  | 80.7                | 205.4               | 63.9  | 259.3 |
| Max pitch (Hz)       | Wookie | 124 | 145.4  | 136.1               | 168                 | 98.5  | 295   |
|                      | Grumph | 39  | 275.2  | 246.3               | 307.4               | 80.7  | 417.2 |
| Pitch amplitude (Hz) | Wookie | 124 | 63.2   | 42.4                | 91.1                | 11.3  | 223.5 |
|                      | Grumph | 39  | 117.5  | 53.9                | 198.8               | 3.4   | 267   |
| F1 (Hz)              | Wookie | 124 | 481.1  | 408.9               | 544.8               | 218   | 620   |
|                      | Grumph | 39  | 302.7  | 266.5               | 367                 | 250   | 578   |
| F2 (Hz)              | Wookie | 124 | 1283.7 | 1138.7              | 1415.4              | 566   | 1708  |
|                      | Grumph | 39  | 1259.1 | 1199.8              | 1421.8              | 914   | 1515  |
| F3 (Hz)              | Wookie | 124 | 1953.3 | 1761.3              | 2197.2              | 1180  | 2550  |
|                      | Grumph | 39  | 1991   | 1863.5              | 2106.2              | 1489  | 2260  |

Supplementary table 2. Descriptive statistics of orang-utan wookies sub-variants

|                     | Sub-variant | N   | Median | 1 <sup>st</sup> qrt | 3 <sup>rd</sup> qrt | min   | max    |
|---------------------|-------------|-----|--------|---------------------|---------------------|-------|--------|
| Max. frequency (Hz) | Low         | 272 | 126    | 117.2               | 137.7               | 76.2  | 527.3  |
|                     | Spontaneous | 124 | 134.8  | 123                 | 161.9               | 99.6  | 1418   |
|                     | High        | 243 | 161.1  | 143.6               | 184.6               | 117.2 | 1183.6 |
| Duration (s)        | Low         | 272 | 0.252  | 0.203               | 0.317               | 0.11  | 0.8    |
|                     | Spontaneous | 124 | 0.381  | 0.252               | 0.515               | 0.13  | 1.24   |
|                     | High        | 243 | 0.307  | 0.252               | 0.387               | 0.11  | 0.76   |
| Max. power (dB)     | Low         | 272 | 150.2  | 146.2               | 153.5               | 133.8 | 160.2  |
|                     | Spontaneous | 124 | 152.7  | 149.5               | 155.1               | 136   | 161.1  |
|                     | High        | 243 | 156.9  | 155.2               | 158.4               | 148   | 163.7  |

## **Video/audio file legends**

Movie S1 – Example of a match trial series between human demonstrator and Rocky.

Audio File S1 – Typical example of a high frequency wookie human-version followed by a match wookie by Rocky.

Audio File S2 – Typical example of a low frequency wookie human-version followed by a match wookie by Rocky.
